# Supplementary material for: A Mn15 single-molecule magnet consisting of a supertetrahedron incorporated in a loop
Source: Royal Society of Chemistry journal article supplement (doi:10.1039/b927205d), 2010-01-01
Supplement: b927205d.pdf [file b927205d.pdf]

## SUPPLEMENTARY INFORMATION

### A Mn<sub>15</sub> Single – Molecule Magnet Consisting of a Supertetrahedron Incorporated in a Loop

*Eleni E. Moushi, Antonio Masello, Wolfgang Wernsdorfer, Vassilios Nastopoulos, George Christou, and Anastasios J. Tasiopoulos\**

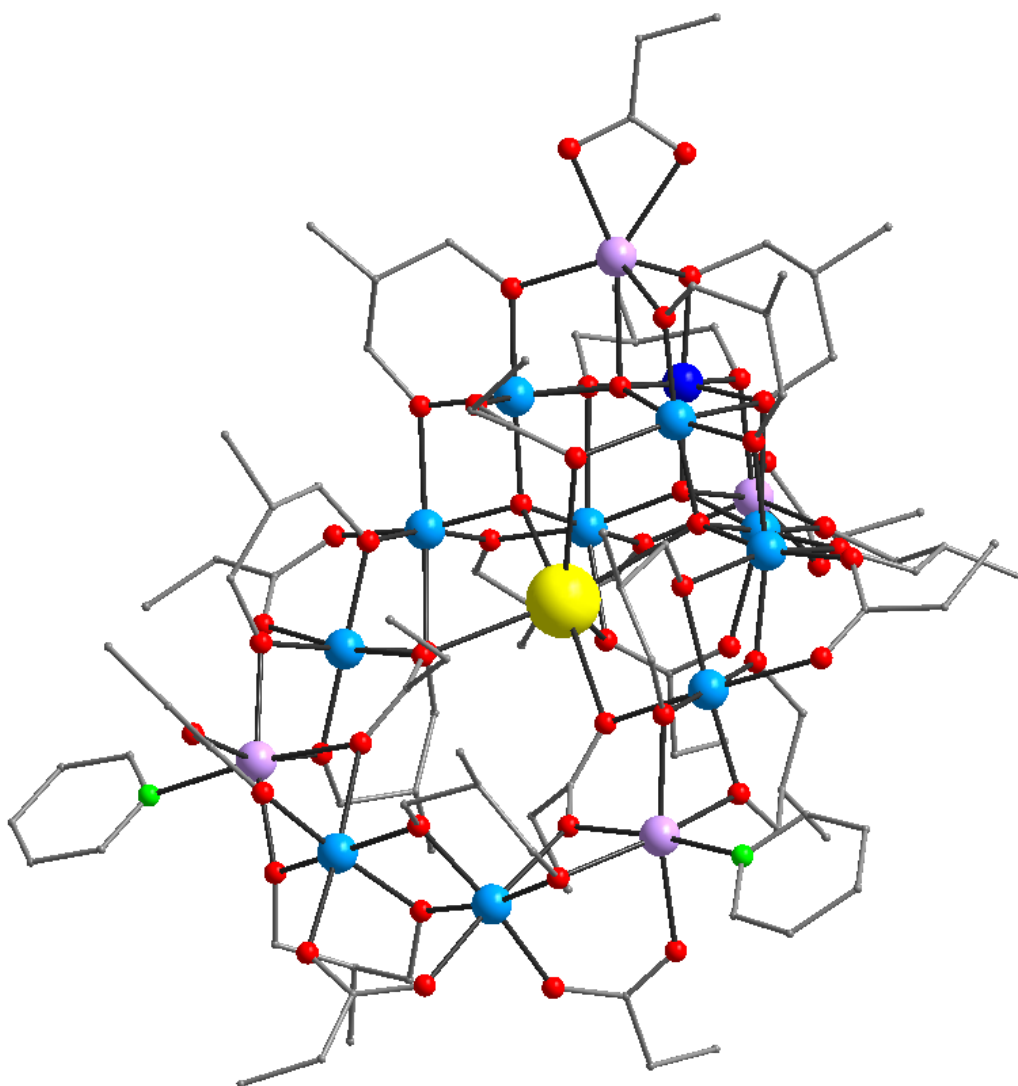

**Figure S1.** Molecular structure of complex **2**. Mn<sup>II</sup> = purple, Mn<sup>III</sup> = blue, Mn<sup>IV</sup> = dark blue, K = yellow, O = red, N = green, C = grey. Hydrogen atoms have been omitted for clarity.

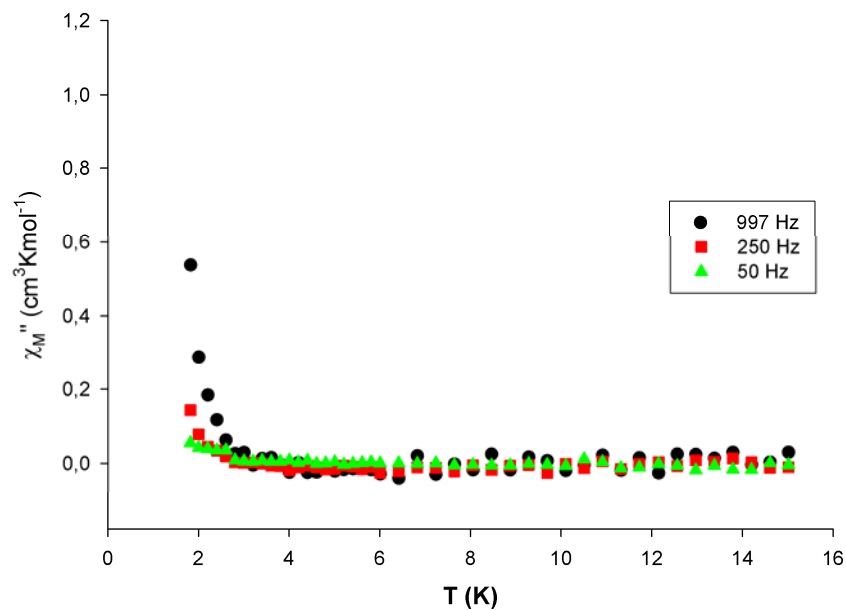

**Fig. S2** Plot of the out-of-phase ( $\chi''_M$ ) ac magnetic susceptibility versus T for **1**·0.5py at the indicated frequencies.

**Table S1.** Selected interatomic distances ( $\text{\AA}$ ) for complex **2**

|                      |                     |
|----------------------|---------------------|
| K <sup>+</sup> - O   | 2.725(5) – 2.938(6) |
| Mn <sup>2+</sup> - O | 2.101(6) - 2.342(5) |
| Mn <sup>3+</sup> - O | 1.858(6) – 2.473(6) |
| Mn <sup>4+</sup> - O | 1.893(5) – 1.903(5) |
| Mn <sup>2+</sup> - N | 2.226(7) – 2.259(7) |

**Table S2.** Bond valence sum (BVS) calculations for complex **2**<sup>a</sup>

|      | Mn <sup>II</sup> | Mn <sup>III</sup> | Mn <sup>IV</sup> |
|------|------------------|-------------------|------------------|
| Mn1  | <u>1.96</u>      | 1.80              | 1.88             |
| Mn2  | 4.21             | 3.85              | <u>4.04</u>      |
| Mn3  | <u>1.90</u>      | 1.74              | 1.82             |
| Mn4  | 3.27             | <u>2.99</u>       | 3.14             |
| Mn5  | 3.30             | <u>3.02</u>       | 3.17             |
| Mn6  | 3.24             | <u>2.96</u>       | 3.11             |
| Mn7  | 3.24             | <u>2.96</u>       | 3.11             |
| Mn8  | 3.19             | <u>2.92</u>       | 3.06             |
| Mn9  | 3.31             | <u>3.03</u>       | 3.18             |
| Mn10 | <u>1.97</u>      | 1.82              | 1.89             |
| Mn11 | 3.23             | <u>2.95</u>       | 3.10             |
| Mn12 | 3.23             | <u>2.95</u>       | 3.10             |
| Mn13 | <u>2.04</u>      | 1.89              | 1.95             |
| Mn14 | 3.29             | <u>3.01</u>       | 3.16             |
| Mn15 | 3.23             | <u>2.96</u>       | 3.10             |

<sup>a</sup> The underlined value is the one closest to the charge for which it was calculated. <sup>b</sup> The oxidation state is the nearest whole number to the underlined value.
